# Supplementary material for: Bayesian prediction of bacterial growth temperature range based on genome sequences
Source: PubMed Central journal article supplement (PMC3521210; doi:10.1186/1471-2164-13-s7-s3), 2012-12-07

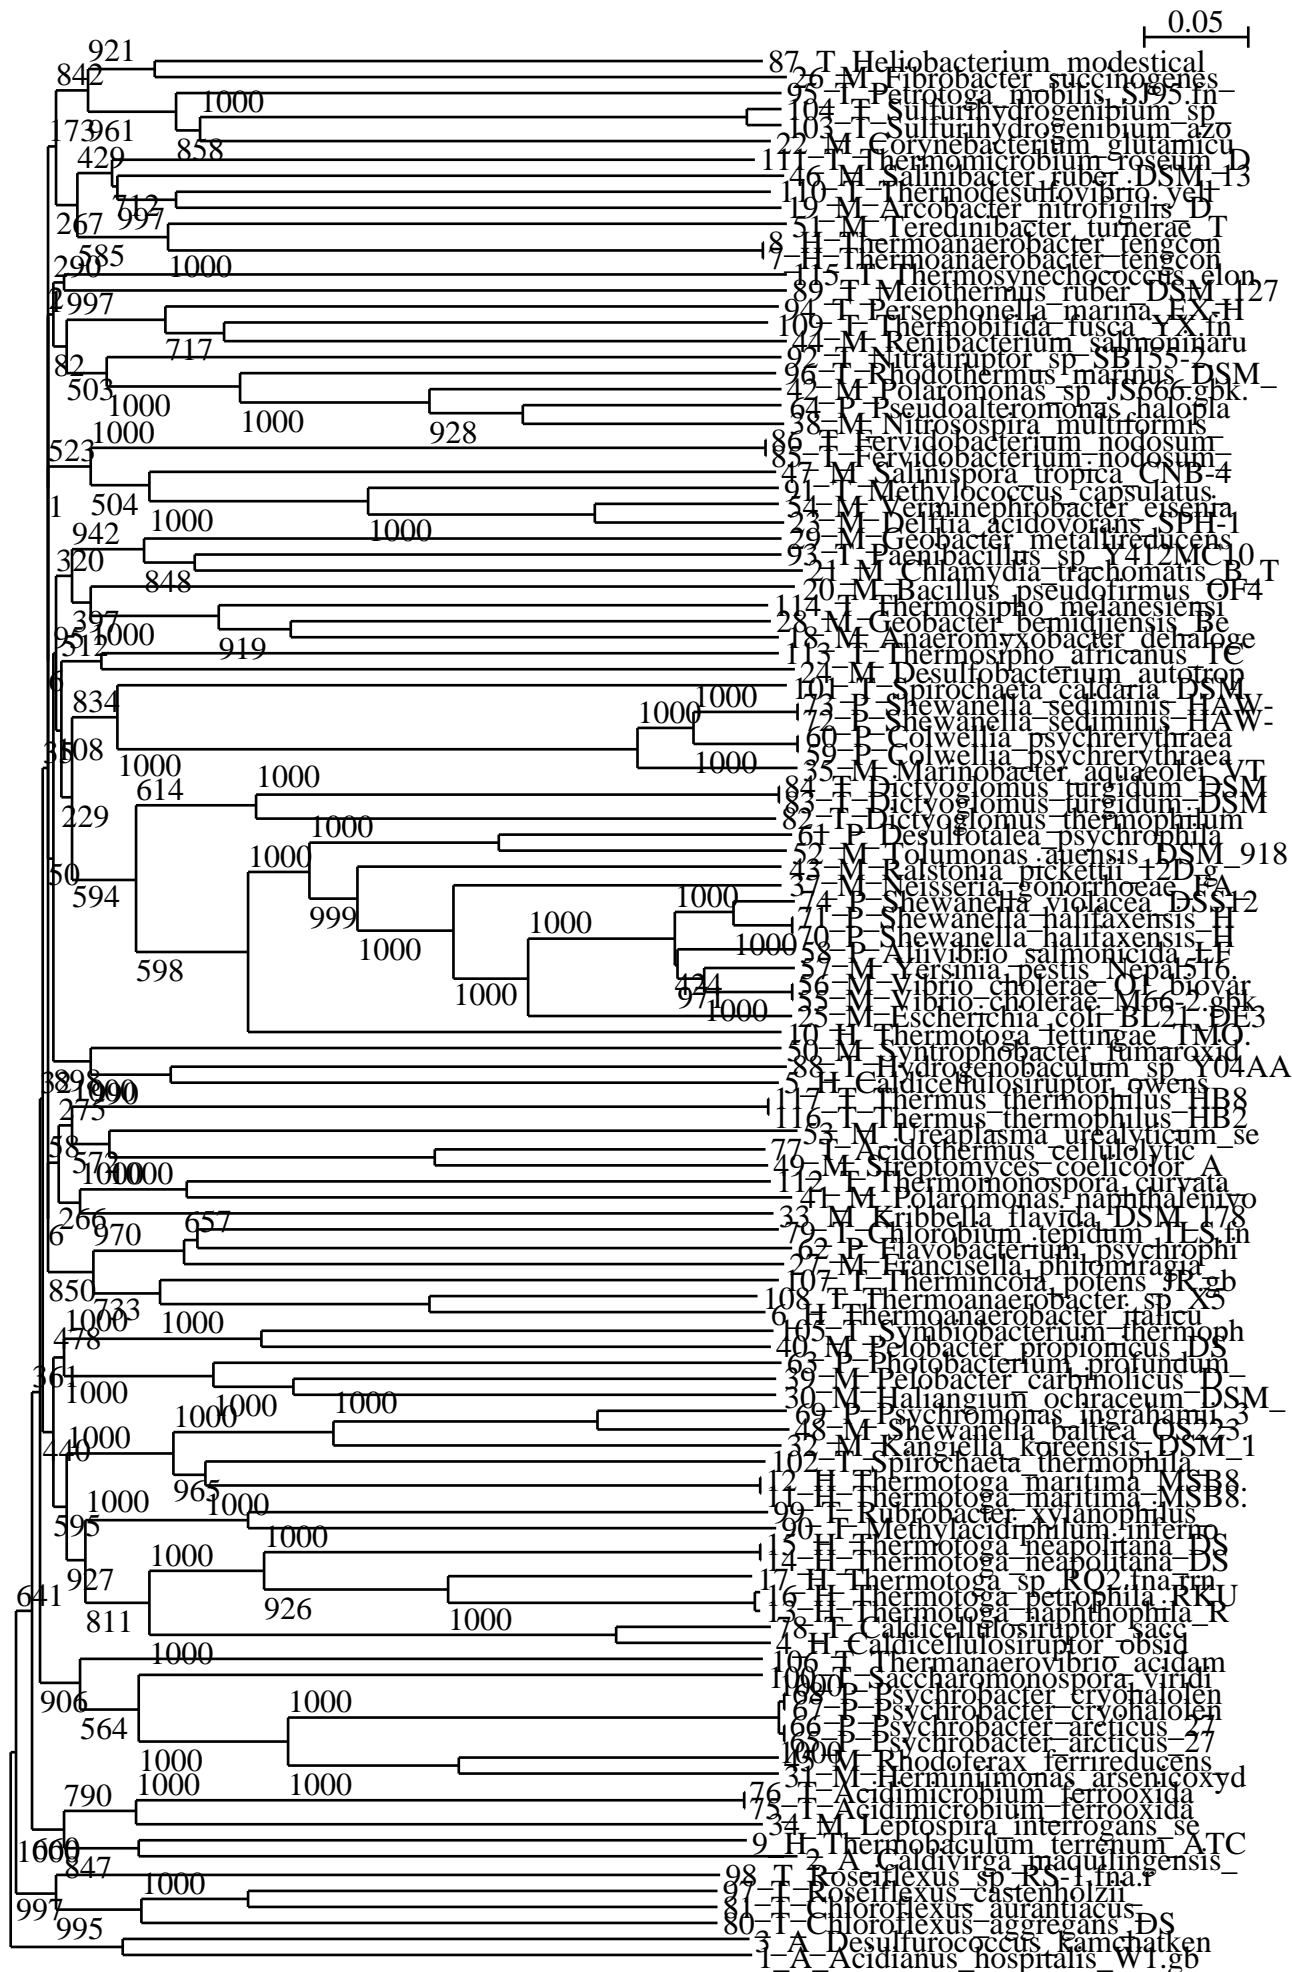

Supplement: 1471-2164-13-S7-S3-S1.pdf [file 1471-2164-13-S7-S3-S1.pdf]
